# Supplementary material for: Quantifying the Infectiousness of Post-Kala-Azar Dermal Leishmaniasis Toward Sand Flies
Source: PubMed Central journal article supplement — Clin Infect Dis. 2018 Oct 24;69(2):251–8. doi: 10.1093/cid/ciy891 (PMC6603265; doi:10.1093/cid/ciy891), 2018-10-24
Supplement: ciy891_suppl_supplementary_legends.pdf [file ciy891_suppl_supplementary_legends.pdf]

## Supplemental files

Figure S1. Median numbers [interquartile range] of sand flies exposed and examined (top box), and composite xenodiagnosis results for VL and PKDL patients, Mymensingh, Bangladesh 2017. (A) direct xenodiagnosis of 47 post-kala-azar dermal leishmaniasis patients (PKDL) patients; (B) indirect xenodiagnosis of 47 PKDL patients; (C) direct xenodiagnosis of 15 visceral leishmaniasis (VL) patients; (D) indirect xenodiagnosis of 15 VL patients.

Table S1. Xenodiagnosis studies of visceral leishmaniasis and PKDL patients in the Indian subcontinent, 1924-2018.

Table S2. Skin parasite loads by xenodiagnosis results and type of PKDL lesions.
